# Supplementary material for: Investigating antimicrobial resistance genes in probiotic products for companion animals
Source: Front Vet Sci. 2024 Oct 22;11:1464351. doi: 10.3389/fvets.2024.1464351 (PMC11534615; doi:10.3389/fvets.2024.1464351)
Supplement: Supplementary file 1 [file Table_1.xlsx]

## Sheet: DNA quality
Product	0,2 ml	2ul+x H2O	Libr concentration (ug/ml)	nM	1nM	5ul + X H2O	Index 1	Index 2	Read number
Product A	0.69	3.45	4.9	1.31	4	4	N715 - ATCTCAGG	S503 - TATCCTCT	9,059,026
Product B	0.948	4.74	7.48	4.04	12.2	12.2	N702 - CGTACTAG	S505 - GTAAGGAG	10,989,104
Product C	45.2	226	450	4.6	13.9	13.9	N705 - GGACTCCT	S505 - GTAAGGAG	8,586,294
Product D	2.12	10.6	19.2	6.56	19.9	19.9	N706 - TAGGCATG	S505 - GTAAGGAG	7,599,134
Product E	1.3	6.5	11	0.346	1	1	N710 - CGAGGCTG	S505 - GTAAGGAG	3,409,408
Product F	8.16	40.8	79.6	5.8	17.6	17.6	N714 - GCTCATGA	S505 - GTAAGGAG	8,599,150
Product G	4.88	24.4	46.8	2.53	7.7	7.7	N715 - ATCTCAGG	S505 - GTAAGGAG	7,383,340
Product H	1.31	6.55	11.1	3.48	10.5	10.5	N701 - TAAGGCGA	S506 - ACTGCATA	7,426,306
Product I	1.06	5.3	8.6	1.04	3.2	3.2	N703 - AGGCAGAA	S506 - ACTGCATA	12,190,218
Product J	0.89	4.45	6.9	2.24	6.8	6.8	N705 - GGACTCCT	S506 - ACTGCATA	6,706,486

## Sheet: ARG set
sample	Percentage Length of Reference Sequence	Best_Identities	Best_Hit_ARO	Nudged	taxon	plasmid	phage	iMGE
B-product	60.95	97.66	CRP	TRUE	Hafnia	+	-	FALSE
B-product	39.31	100	lmrD	TRUE	Lactococcus	-	-	FALSE
B-product	30.94	100	floR	TRUE	Proteobacteria	+	-	FALSE
Product B	100.78	99.84	tetS	FALSE	Streptococcus	+	-	TRUE
B-product	13.61	100	floR	TRUE	Bacteria	+	-	FALSE
Product B	100	98.9	AAC(6')-Ii	FALSE	Enterococcus	-	-	FALSE
Product B	98.79	99.18	ErmB	FALSE	Enterococcus	+	-	FALSE
B-product	79.14	99.55	APH(6)-Id	TRUE	Pseudomonas	+	-	FALSE
B-product	38.68	99.39	tet(A)	TRUE	Gammaproteobacteria	+	-	FALSE
B-product	86.04	50.88	tet(D)	FALSE	Acinetobacter	-	-	FALSE
B-product	30.52	100	tetM	TRUE	Acinetobacter	+	-	FALSE
B-product	23.04	99.35	lmrD	TRUE	Lactococcus	-	-	FALSE
B-product	27.06	99.02	ACC-3	TRUE	Hafnia	+	-	FALSE
B-product	44.13	97.87	tetM	TRUE		-	-	FALSE
B-product	67.9	100	APH(3')-Ia	TRUE	Bacteria	+	-	FALSE
B-product	52.58	95.24	tetM	TRUE	Staphylococcus	-	-	FALSE
B-product	22.66	100	APH(6)-Id	TRUE	Klebsiella	+	-	FALSE
Product B	100	99.63	APH(3'')-Ib	FALSE	Klebsiella	+	-	FALSE
B-product	26.77	100	tet(C)	TRUE	Bacteria	-	-	FALSE
Product B	100	85.25	rsmA	FALSE	Hafnia	+	-	FALSE
B-product	33.97	100	aadA27	TRUE	Acinetobacter	-	-	FALSE
Product B	100	100	APH(3')-IIIa	FALSE	Lactococcus	-	-	FALSE
Product B	100	99.44	SAT-4	FALSE	Lactococcus	-	-	FALSE
Product B	109.42	100	aad(6)	FALSE	Lactococcus	-	-	FALSE
Product B	100	97.15	msrC	TRUE	Enterococcus	-	-	FALSE
B-product	33.69	100	ACC-3	TRUE	Hafnia	-	-	FALSE
Product B	96.33	95.93	Escherichia coli EF-Tu mutants conferring resistance to Pulvomycin	FALSE	Hafnia	-	-	FALSE
Product B	100	99	eatAv	TRUE	Enterococcus	-	-	FALSE
Product C	100	98.9	AAC(6')-Ii	FALSE	Enterococcus	-	-	FALSE
Product C	100	97.15	msrC	TRUE	Enterococcus	-	-	FALSE
Product C	100	99	eatAv	TRUE	Enterococcus	-	-	FALSE
Product D	104.44	100	efmA	FALSE	Lactobacillales	-	-	FALSE
Product D	100	97.15	msrC	TRUE	Enterococcus	-	-	FALSE
Product D	100	98.9	AAC(6')-Ii	FALSE	Enterococcus	-	-	FALSE
Product D	100	99	eatAv	TRUE	Enterococcus	-	-	FALSE
Product E	100	100	efmA	FALSE	Enterococcus	-	-	FALSE
Product E	100	98.9	AAC(6')-Ii	FALSE	Enterococcus	-	-	FALSE
Product E	100	97.15	msrC	TRUE	Enterococcus	-	-	FALSE
Product E	100	99	eatAv	TRUE	Enterococcus	-	-	FALSE
F-product	108.21	38.46	Trimethoprim-resistant dihydrofolate reductase DfrA43	FALSE	Saccharomyces	-	-	FALSE
Product F	100	97.15	msrC	TRUE	Enterococcus	-	-	FALSE
Product F	100	98.9	AAC(6')-Ii	FALSE	Enterococcus	+	-	FALSE
Product F	100	99	eatAv	TRUE	Enterococcus	-	-	FALSE
Product G	100	97.15	msrC	TRUE	Enterococcus	-	-	FALSE
G-product	27.91	97.12	lsaA	TRUE	Enterococcus	+	-	FALSE
Product G	100	98.9	AAC(6')-Ii	FALSE	Enterococcus	-	-	FALSE
Product G	100	99	eatAv	TRUE	Enterococcus	-	-	FALSE
Product H	100	98.9	AAC(6')-Ii	FALSE	Enterococcus	-	-	FALSE
Product H	100	97.15	msrC	TRUE	Enterococcus	-	-	FALSE
Product H	100	99	eatAv	TRUE	Enterococcus	-	-	FALSE
Product I	100	99.75	tet(C)	FALSE	Enterobacterales	+	-	FALSE
I-product	23.64	100	lmrD	TRUE	Lactococcus	+	-	FALSE
I-product	78.65	99.52	APH(3'')-Ib	TRUE	Enterobacteriaceae	+	-	FALSE
Product I	99.28	99.64	APH(6)-Id	FALSE	Enterobacteriaceae	+	-	FALSE
I-product	10.23	100	APH(3')-IIIa	TRUE	Staphylococcus	-	-	FALSE
I-product	47.49	86.07	ANT(3'')-IIc	FALSE	Acinetobacter	-	-	FALSE
I-product	56.17	99.2	lmrD	TRUE	Lactococcus	-	-	FALSE
Product I	100.78	99.84	tetS	FALSE	Streptococcus	+	-	FALSE
Product I	100	97.15	msrC	TRUE	Enterococcus	-	-	FALSE
I-product	35.03	100	tet(D)	FALSE	Gammaproteobacteria	+	-	FALSE
Product I	98.79	99.18	ErmB	FALSE	Enterococcus	+	-	FALSE
I-product	12.88	100	APH(3')-IIIa	TRUE	Enterococcus	+	-	FALSE
Product I	100	96.56	tetM	FALSE	Enterococcus	+	-	FALSE
I-product	44.13	99.66	lmrD	TRUE	Lactococcus	-	-	FALSE
Product I	100	100	APH(3')-Ia	FALSE	Klebsiella	+	-	TRUE
I-product	42.38	100	mphB	TRUE	Escherichia	+	-	FALSE
I-product	58.89	96.42	lmrD	TRUE	Lactococcus	-	-	FALSE
Product I	100	98.9	AAC(6')-Ii	FALSE	Enterococcus	-	-	FALSE
I-product	25.32	99	tet(39)	TRUE	Gammaproteobacteria	-	-	FALSE
Product I	96.74	100	catA8	FALSE	Lactobacillales	+	-	FALSE
Product I	109.42	100	aad(6)	FALSE	Staphylococcus	-	-	FALSE
Product I	100	99.44	SAT-4	FALSE	Staphylococcus	-	-	FALSE
Product I	100	100	APH(3')-IIIa	FALSE	Staphylococcus	-	-	FALSE
I-product	31.3	100	tetM	TRUE	Lactococcus	+	-	TRUE
Product I	100	99	eatAv	TRUE	Enterococcus	-	-	FALSE
Product J	100	100	efmA	FALSE	Enterococcus	-	-	FALSE
Product J	100	98.9	AAC(6')-Ii	FALSE	Enterococcus	-	-	FALSE
Product J	100	97.15	msrC	TRUE	Enterococcus	-	-	FALSE
Product J	100	99	eatAv	TRUE	Enterococcus	-	-	FALSE

## Sheet: Product B
Number	Product	Strain	Strain number	CFU	Animals
4.	Product B	Enterococcus faecium	NCIMB10415 (4B1705)	1,125*108 CFU	dogs, cats
ARO	Nudged	taxon	plasmid	phage	iMGE
AAC(6')-Ii	FALSE	Enterococcus	-	-	FALSE
aad(6)	FALSE	Lactococcus	-	-	FALSE
APH(3')-Ia	TRUE	Bacteria	+	-	FALSE
APH(3'')-Ib	FALSE	Klebsiella	+	-	FALSE
APH(3')-IIIa	FALSE	Lactococcus	-	-	FALSE
APH(6)-Id	TRUE	Pseudomonas	+	-	FALSE
CRP	TRUE	Hafnia	+	-	FALSE
eatAv	TRUE	Enterococcus	-	-	FALSE
ErmB	FALSE	Enterococcus	+	-	FALSE
Escherichia coli EF-Tu mutants conferring resistance to Pulvomycin	FALSE	Hafnia	-	-	FALSE
msrC	TRUE	Enterococcus	-	-	FALSE
rsmA	FALSE	Hafnia	+	-	FALSE
SAT-4	FALSE	Lactococcus	-	-	FALSE
tet(D)	FALSE	Acinetobacter	-	-	FALSE
tetS	FALSE	Streptococcus	+	-	TRUE

## Sheet: Product C
Number	Product	Strain	Strain number	CFU	Animals
7.	Product C	Enterococcus faecium	DSM10663/NCIMB10415 (4B1707)	1*1013 CFU/kg, 2*109 CFU/kapszula	dogs, cats
ARO	Nudged	taxon	plasmid	phage	iMGE
AAC(6')-Ii	FALSE	Enterococcus	-	-	FALSE
eatAv	TRUE	Enterococcus	-	-	FALSE
msrC	TRUE	Enterococcus	-	-	FALSE

## Sheet: Product D
Number	Product	Strain	Strain number	CFU	Animals
8.	Product D	Lactobacillus plantarum	DSM12837	1*109 CFU/g	cats
		Pediococcus acidilactici	DSM16243
		Enterococcus faecium	NCIMB10415
ARO	Nudged	taxon	plasmid	phage	iMGE
AAC(6')-Ii	FALSE	Enterococcus	-	-	FALSE
eatAv	TRUE	Enterococcus	-	-	FALSE
efmA	FALSE	Lactobacillales	-	-	FALSE
msrC	TRUE	Enterococcus	-	-	FALSE

## Sheet: Product E
Number	Product	Strain	Strain number	CFU	Animals
10.	Product E	Lactobacillus plantarum	DSM12837	1*109 CFU/g	dogs
		Pediococcus acidilactici	DSM16243
		Enterococcus faecium	NCIMB10415
ARO	Nudged	taxon	plasmid	phage	iMGE
AAC(6')-Ii	FALSE	Enterococcus	-	-	FALSE
eatAv	TRUE	Enterococcus	-	-	FALSE
efmA	FALSE	Enterococcus	-	-	FALSE
msrC	TRUE	Enterococcus	-	-	FALSE

## Sheet: Product F
Number	Product	Strain	Strain number	CFU	Animals
14.	Product F	Pediococcus pentasaccus	DSM1283U (1K2103)	1*109 CFU/g	dogs, cats
		Lactobacillus brevis	DSM12835 (1k20710)
		Lactobacillus buchnerii	DSM12856 (1k2075)
		Lactobacillus plantarum	DSM12836 (1K2078)
		Lactobacillus rhamnosus	NCIMB30121 (1K20711)
		Enterococcus faecium	DSM10663/NCIMB10415 (4B1707)	2,8*1011 CFU
		Lactobacillus acidophilus	CECTU529 (4B1715)	8,6*1012 CFU
ARO	Nudged	taxon	plasmid	phage	iMGE
AAC(6')-Ii	FALSE	Enterococcus	+	-	FALSE
eatAv	TRUE	Enterococcus	-	-	FALSE
msrC	TRUE	Enterococcus	-	-	FALSE
msrC	TRUE	Enterococcus	-	-	FALSE

## Sheet: Product G
Number	Product	Strain	Strain number	CFU	Animals
15.	Product G	Pediococcus pentasaccus	DSM1283U (1K2103)	1*109 CFU/g	dogs, cats
		Lactobacillus brevis	DSM12835 (1k20710)
		Lactobacillus buchnerii	DSM12856 (1k2075)
		Lactobacillus plantarum	DSM12836 (1K2078)
		Lactobacillus rhamnosus	NCIMB30121 (1K20711)
		Enterococcus faecium	DSM10663/NCIMB10415 (4B1707)	1,7*1011 CFU
		Lactobacillus acidophilus	CECTU529 (4B1715)	5,2*1012 CFU
ARO	Nudged	taxon	plasmid	phage	iMGE
AAC(6')-Ii	FALSE	Enterococcus	-	-	FALSE
eatAv	TRUE	Enterococcus	-	-	FALSE

## Sheet: Product H
Number	Product	Strain	Strain number	CFU	Animals
16.	Product H	Enterococcus faecium	NCIMB10415 (4B1705)	2*1011 CFU	dogs
ARO	Nudged	taxon	plasmid	phage	iMGE
AAC(6')-Ii	FALSE	Enterococcus	-	-	FALSE
eatAv	TRUE	Enterococcus	-	-	FALSE
msrC	TRUE	Enterococcus	-	-	FALSE

## Sheet: Product I
Number	Product	Strain	Strain number	CFU	Animals
18.	Product I	Enterococcus faecium	NCIMB10415 (4B1705)	2*1011 CFU	dogs, cats
ARO	Nudged	taxon	plasmid	phage	iMGE
AAC(6')-Ii	FALSE	Enterococcus	-	-	FALSE
aad(6)	FALSE	Staphylococcus	-	-	FALSE
APH(3')-Ia	FALSE	Klebsiella	+	-	TRUE
APH(3'')-Ib	TRUE	Enterobacteriaceae	+	-	FALSE
APH(3')-IIIa	FALSE	Staphylococcus	-	-	FALSE
APH(6)-Id	FALSE	Enterobacteriaceae	+	-	FALSE
catA8	FALSE	Lactobacillales	+	-	FALSE
eatAv	TRUE	Enterococcus	-	-	FALSE
ErmB	FALSE	Enterococcus	+	-	FALSE
msrC	TRUE	Enterococcus	-	-	FALSE
SAT-4	FALSE	Staphylococcus	-	-	FALSE
tet(C)	FALSE	Enterobacterales	+	-	FALSE
tetM	FALSE	Enterococcus	+	-	FALSE
tetS	FALSE	Streptococcus	+	-	FALSE

[truncated: 1 more sheets: Product J]
